# Supplementary material
Source: publisher figshare collection journal article supplement (https://karger.figshare.com/ndownloader/files/17380331)
Supplement: Supplementary file 1 [file 17380331]

**Supplemental material 1** Description of clinical setting and microbiologic data of enrolled patients.

|  | Sepsis/septic shock origin | Microbiology data |
| --- | --- | --- |
| Patient 1 | Abdomen (bowel perforation) | *Polymicrobial* (abdominal fluid, faecal peritonitis))  *Escherichia coli* (urine) |
| Patient 2 | Respiratory (pneumonia) | No microbiological isolation in respiratory cultures |
| Patient 3 | Respiratory (pneumonia) | *Streptococcus pneumoniae* (blood) |
| Patient 4 | Urinary tract | *Escherichia coli* ESBL (urine)  *Escherichia coli + Enterococcus faecalis* MDR (urine) |
| Patient 5 | Urinary tract (renal abscess) | *Klebsiella pneumoniae* (urine and blood) |
| Patient 6 | Soft tissues (gluteal abscess) | *Klebsiella pneumoniae* KPC (surgical sample of purulent material) |
| Patient 7 | Mediastinitis (in peritonsillar abscess) | *Streptococcus constellatum* (surgical sample of purulent material + brochoalveolar lavage) |
| Patient 8 | Soft tissues (Necrotizing fasciitis of abdominal wall) | *Escherichia coli* ESBL (wound culture) |
| Patient 9 | Abdomen (cholangitis) | *Klebsiella pneumoniae* (blood) |
